# Supplementary material
Source: MDPI journal article supplement (https://www.mdpi.com/2071-1050/15/10/8167)
Supplement: s1 [file s1]

The following figure shows various forms of family communal spaces which are located adjacent to the beach/highest tide line and the various activities that take place in it and their users

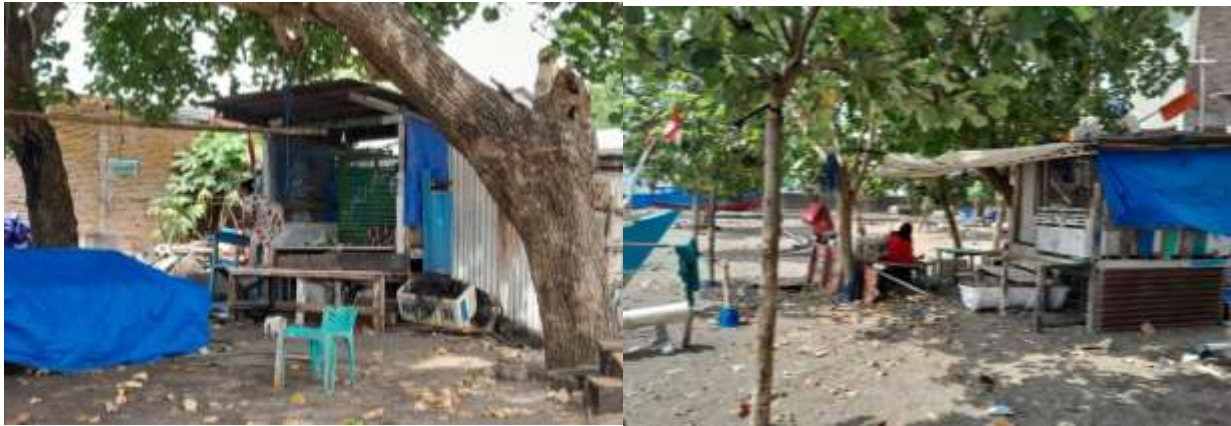

Left figure, a mother working in the family communal room preparing styrofoam for fish containers for her husband who is going to sea

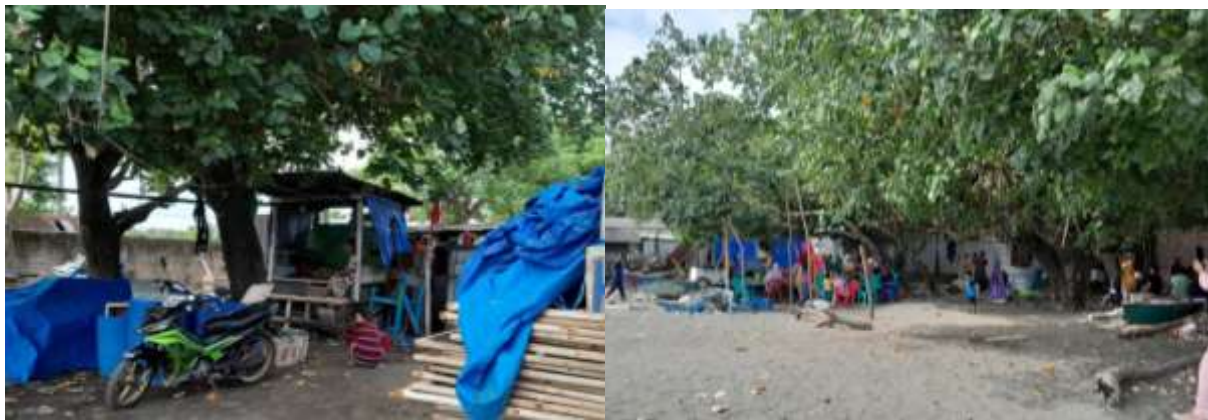

Left figure, family (husband, wife and other family members) relax and interact. Right figure, big family gathering, relaxing, working, feasting on fish

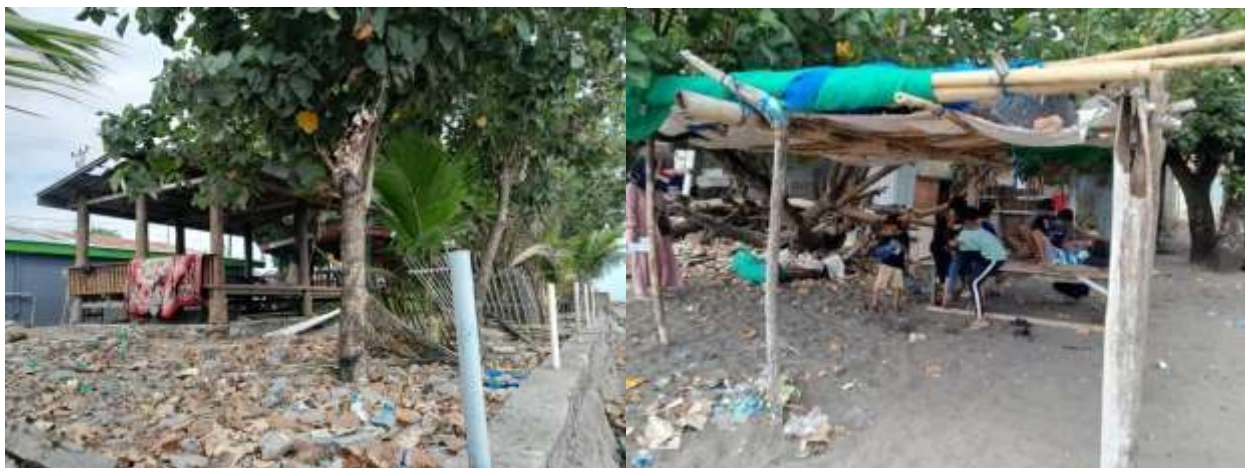

Right figure, teenagers and children relaxing, interacting, and playing games



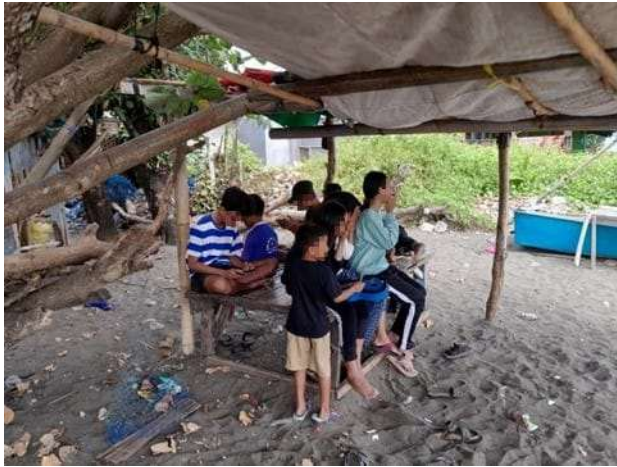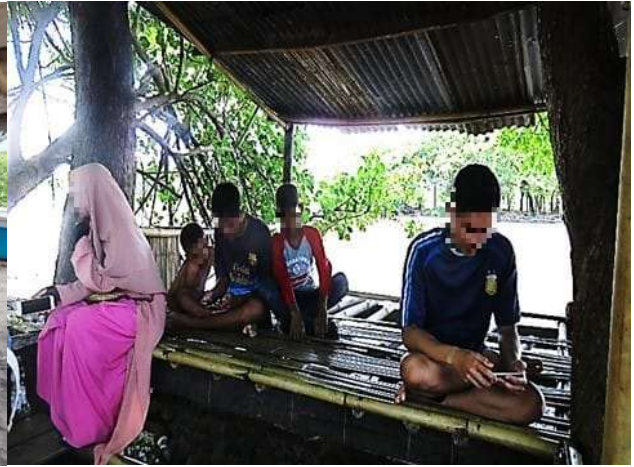

Teenagers and children relax, interact and play

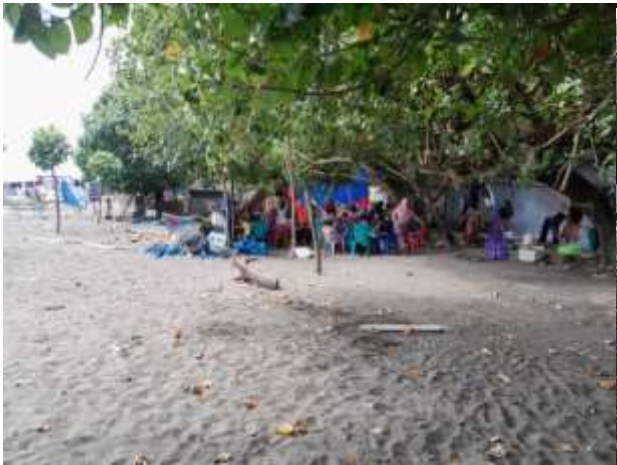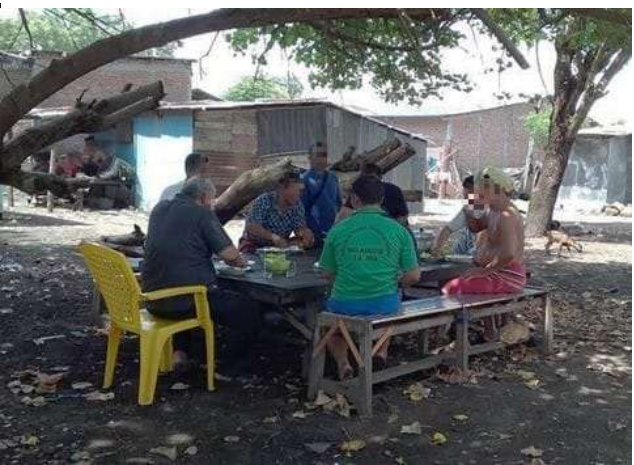

Family feasting on fish while interacting

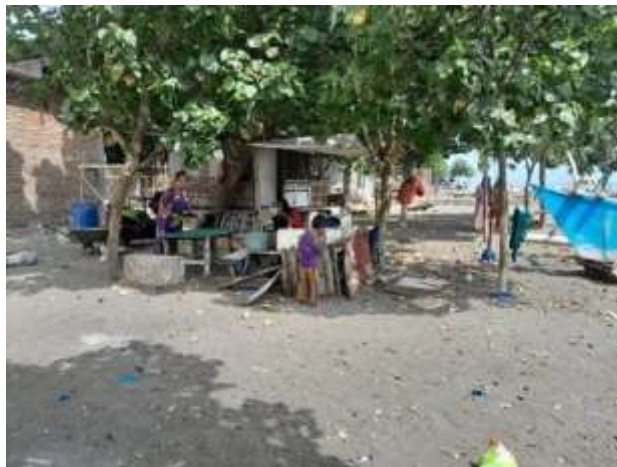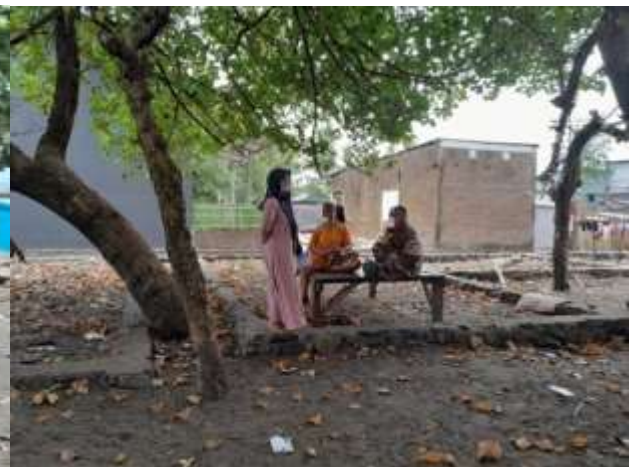

On the right figure, women work, interact and while controlling children and the environment. Left figure of mothers relaxing, interacting, and controlling the environment



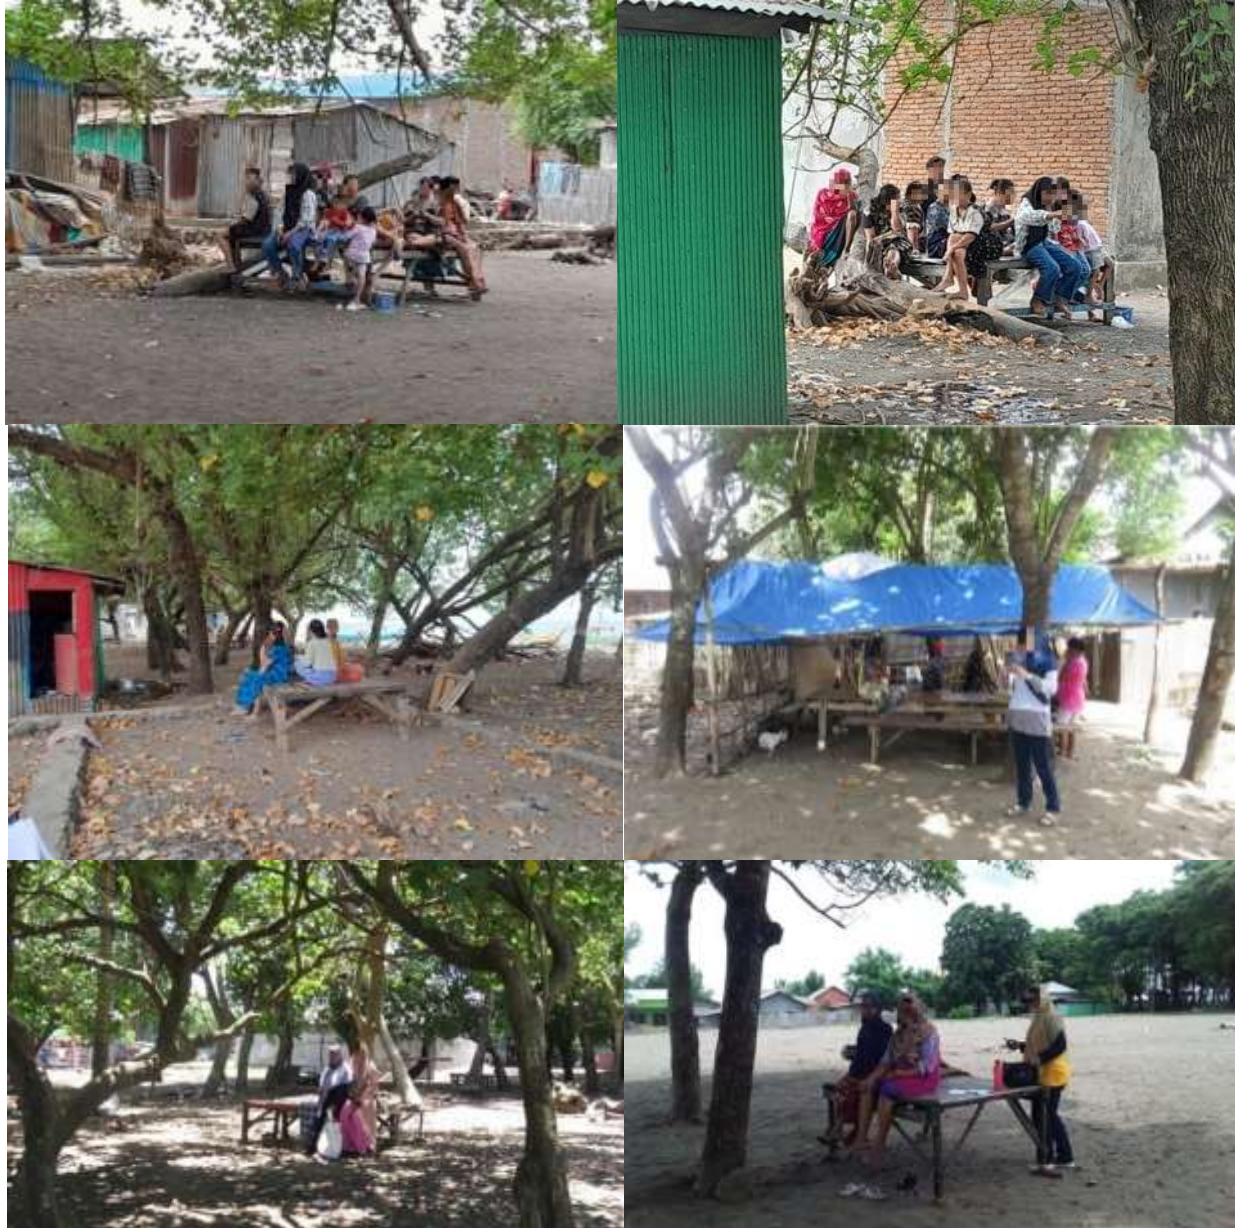

Family groups relax, interact, control family and environment



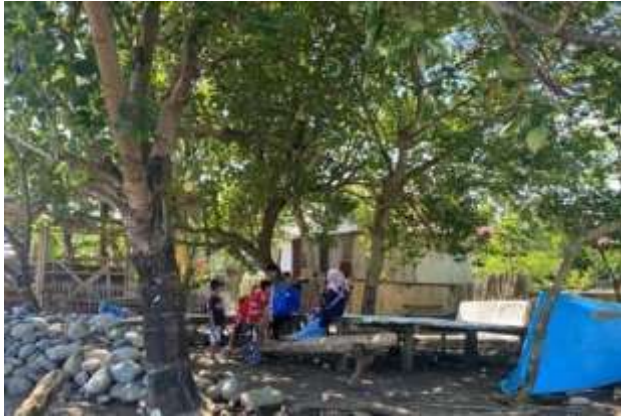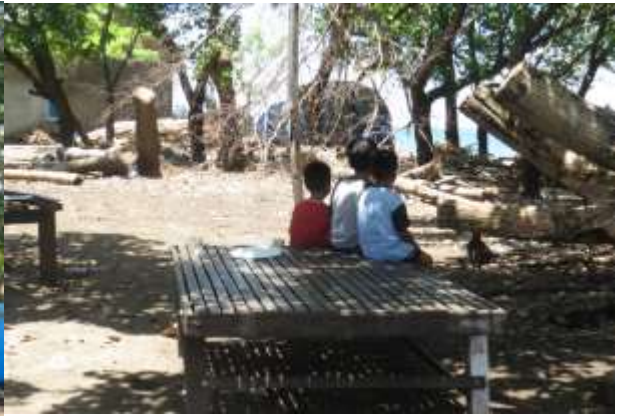

Children playing

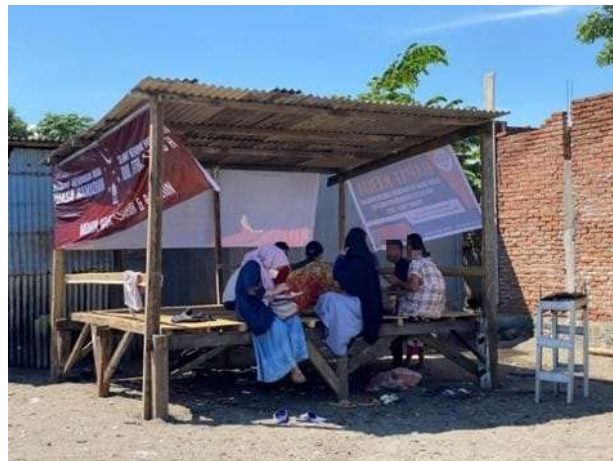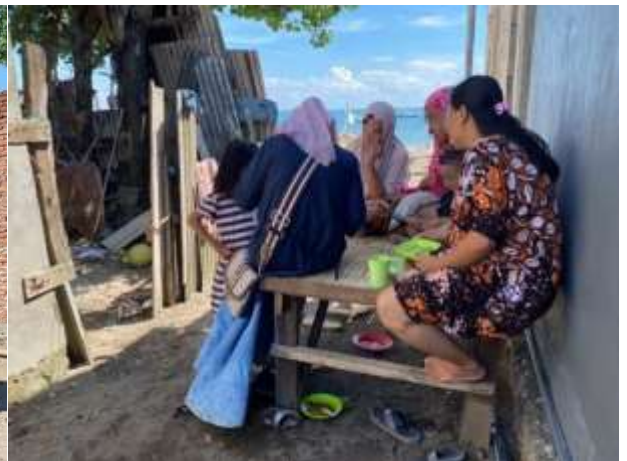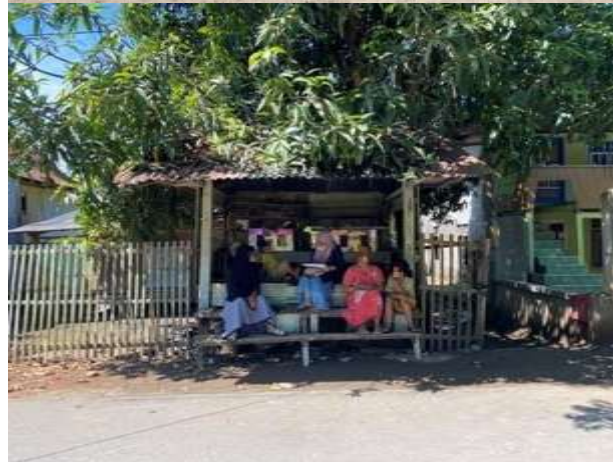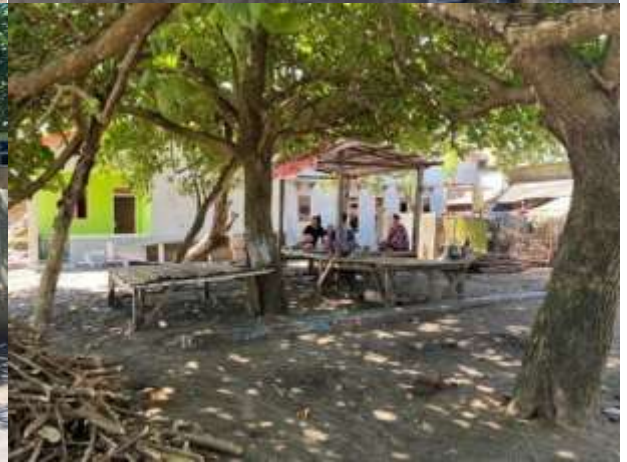

Family groups relax, interact, control family and environment



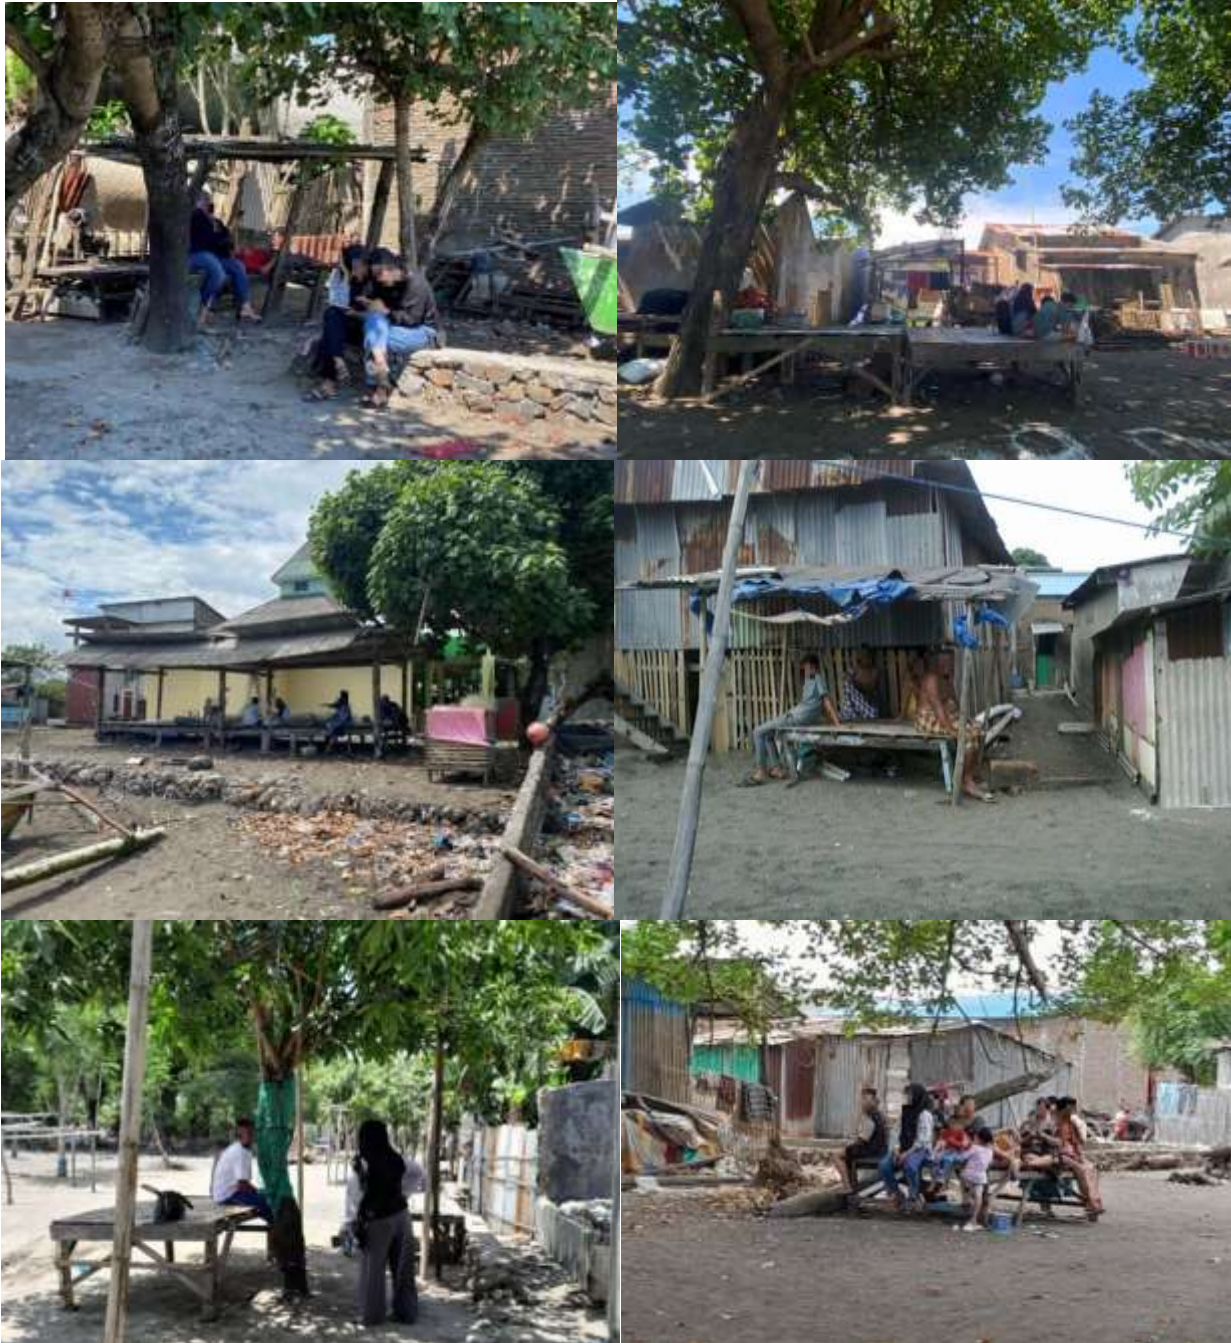

Family groups relax, interact, control family and environment



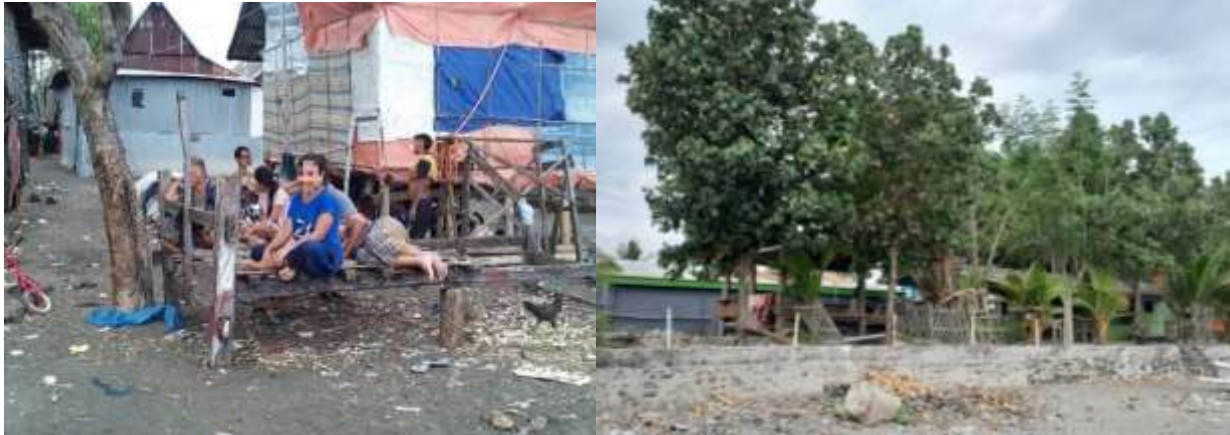

Family groups relax, interact, control family and environment

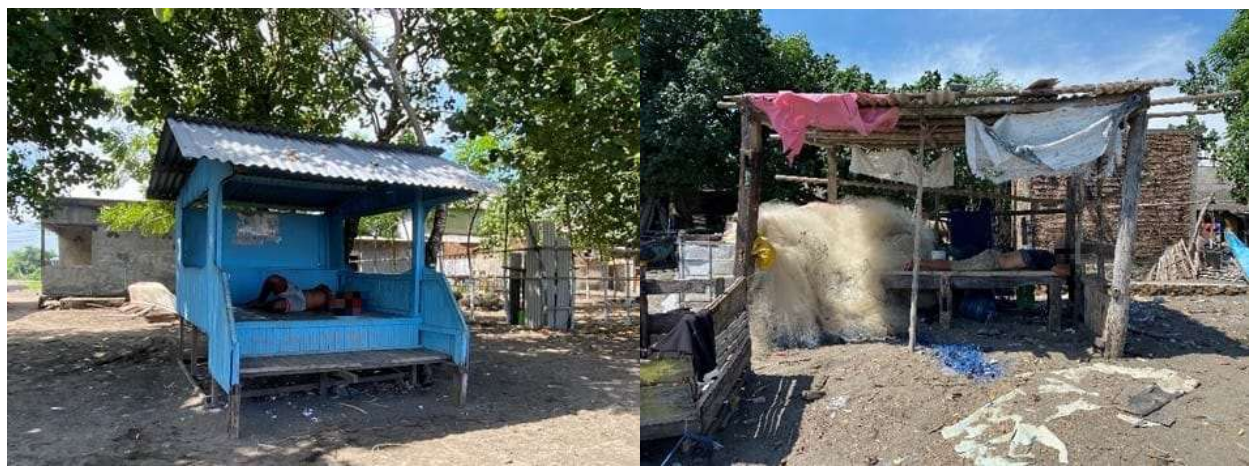

Fishermen are taking a nap

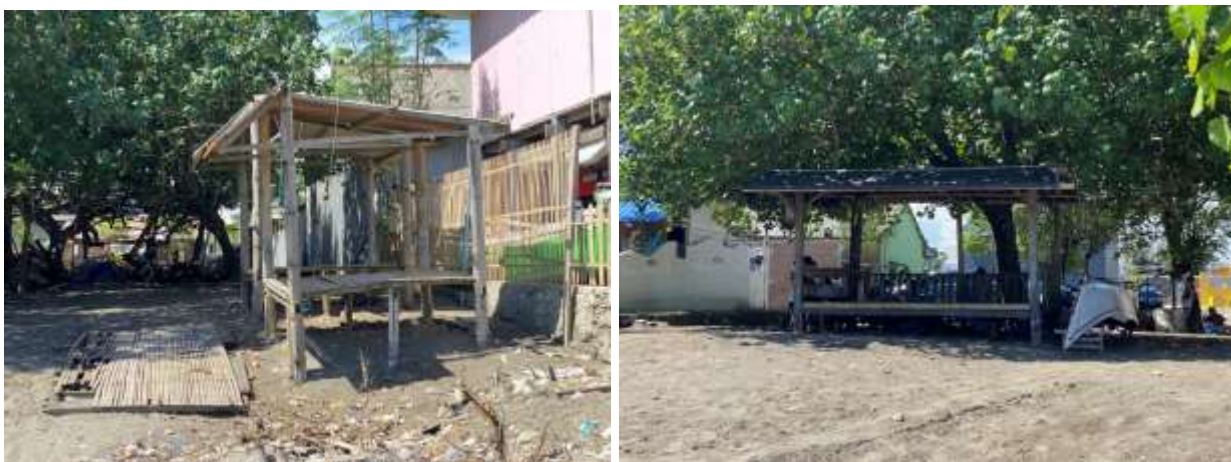

Form of family communal space that is given a roof for protection from heat and rain
